# Supplementary material
Source: Springer Nature journal article supplement (https://www.springermedizin.de/resource/supplementary/12958_2010_771_MOESM1_ESM.pdf/9568460)

A

| Tumor type | Percent of CD133 <sup>+</sup> cells |
|------------|-------------------------------------|
| T1         | 5.7                                 |
| T2         | 27.4                                |
| T3         | 18.5                                |

B

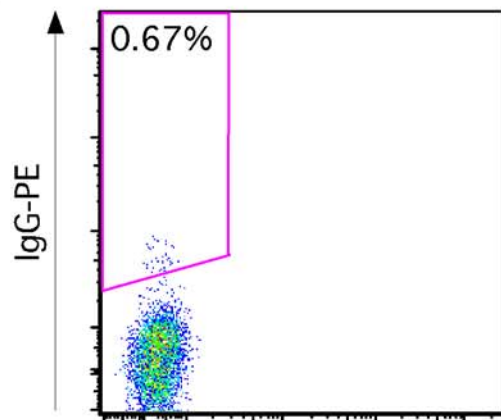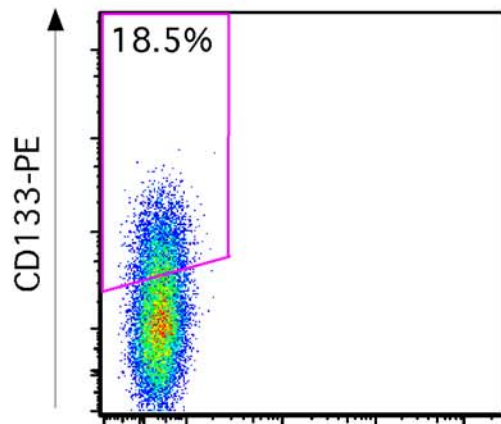

Supplement: MOESM1 [file 9568460]
